# Supplementary material for: Broa, an Ethnic Maize Bread, as a Source of Phenolic Compounds
Source: MDPI journal article supplement (doi:10.3390/antiox10050672), 2021-04-26
Supplement: s1 [file s1]

**Table S1.** Description of the maize flours used in the production of *broas*.

| Population                 | Description                                                                                                                             |
|----------------------------|-----------------------------------------------------------------------------------------------------------------------------------------|
| <b>Broa-213</b>            | Yellow kernel. Early intermediate type. Collect from the farmer in the 2005 expedition to the Central Northern region of Portugal [20]. |
| <b>Pigarro</b>             | White kernel. Flint type FAO 300 with strong fasciation expression, used in the best soils for human consumption.                       |
| <b>Castro Verde</b>        | Yellow colour. Late flint type FAO 600, with big kernel row number and large ear size.                                                  |
| <b>Verdeal de Aperrela</b> | White colour. Late flint type FAO 600, used for breadmaking.                                                                            |
| <b>Fandango</b>            | Yellow colour. Synthetic open-pollinated variety, dent type FAO 600, big kernel row number and large ear size.                          |
| <b>Commercial</b>          | White colour. Nacional Type 175, wholegrain flour.                                                                                      |

**Table S2.** Increase (%) in the antioxidant activity (AA) and phenolic content (PC) after hydrolysis of the soluble compounds (from the soluble [SF] to the soluble-hydrolysed [SHF] fractions) of cereal flours.\*: Significant difference between SF and SHF ( $p < 0.001$ ).

| Samples             | AA increase (%) | PC increase (%) |
|---------------------|-----------------|-----------------|
| Broa-213            | 89              | 9               |
| Pigarro             | 112             | 15              |
| Castro Verde        | 72              | 13              |
| Verdeal de Aperrela | 93              | 27              |
| Fandango            | 128             | 11              |
| Commercial          | 199             | 21              |
| <i>Average</i>      | $115 \pm 45$ *  | $16 \pm 7$ *    |
| Wheat               | - 25            | 20              |
| Rye                 | 12              | 7               |

**Table S3.** Contribution (%) of soluble-free, total soluble and insoluble ferulic (FA) and *p*-coumaric (pCA) acids for the antioxidant activity of the soluble (SF), soluble-hydrolysed (SHF) and insoluble fractions (IF) of cereal flours extracts, respectively.

| Sample              | Soluble fraction (SF) |               |                | Soluble-hydrolysed fraction (SHF) |               |                | Insoluble fraction (IF) |               |                |
|---------------------|-----------------------|---------------|----------------|-----------------------------------|---------------|----------------|-------------------------|---------------|----------------|
|                     | FA                    | pCA           | Others         | FA                                | pCA           | Others         | FA                      | pCA           | Others         |
| Broa-213            | 0.6                   | 0.4           | 99.0           | 6.5                               | 2.8           | 90.7           | 44.0                    | 6.1           | 49.9           |
| Pigarro             | 0.5                   | 0.3           | 99.2           | 5.9                               | 2.5           | 91.6           | 40.8                    | 6.1           | 53.0           |
| Castro Verde        | 0.5                   | 0.5           | 99.0           | 5.9                               | 3.1           | 91.1           | 47.4                    | 6.4           | 46.2           |
| Verdeal de Aperrela | 0.6                   | 0.4           | 99.0           | 7.8                               | 2.6           | 89.6           | 50.7                    | 5.5           | 43.7           |
| Fandango            | 0.5                   | 0.4           | 99.0           | 5.6                               | 2.1           | 92.3           | 41.4                    | 4.0           | 54.6           |
| Commercial          | 0.6                   | 0.6           | 98.8           | 6.2                               | 2.1           | 91.7           | 37.1                    | 2.9           | 60.0           |
| <i>Average</i>      | $0.6 \pm 0.1$         | $0.4 \pm 0.1$ | $99.0 \pm 0.1$ | $6.3 \pm 0.8$                     | $2.5 \pm 0.4$ | $91.2 \pm 0.9$ | $43.6 \pm 4.9$          | $5.2 \pm 1.4$ | $51.3 \pm 5.9$ |
| Wheat               | 0.9                   | 0.1           | 99.0           | 4.3                               | 0.2           | 95.5           | 15.9                    | 0.6           | 83.5           |
| Rye                 | 1.0                   | 0.4           | 98.7           | 4.5                               | 1.3           | 94.2           | 15.0                    | 1.7           | 83.3           |

Others: other compounds or synergistic effects; FA: 15.6  $\mu\text{mol TE mg}^{-1}$ ; pCA: 23  $\mu\text{mol TE mg}^{-1}$ .

**Table S4.** Increase (%) in the antioxidant activity (AA) and phenolic content (PC) after hydrolysis of the soluble compounds (from the soluble [SF] to the soluble-hydrolysed [SHF] fractions) of *broas*.

| Samples             | AA increase (%) | PC increase (%) |
|---------------------|-----------------|-----------------|
| Broa-213            | 24              | - 2             |
| Pigarro             | 39              | 17              |
| Castro Verde        | 62              | 27              |
| Verdeal de Aperrela | 37              | 20              |
| Fandango            | 16              | - 7             |
| Commercial          | 91              | 0               |
| <i>Average</i>      | $45 \pm 28$ *   | $9 \pm 14$      |

\*: Significant difference between SF and SHF ( $p < 0.001$ ).

**Table S5.** Contribution (%) of soluble-free, total soluble and insoluble ferulic (FA) and *p*-coumaric (pCA) acids for the antioxidant activity of the soluble (SF), soluble-hydrolysed (SHF) and insoluble fractions (IF) of *broas* extracts, respectively.

| Sample              | Soluble fraction (SF) |               |                | Soluble-hydrolysed fraction (SHF) |               |                | Insoluble fraction (IF) |               |                |
|---------------------|-----------------------|---------------|----------------|-----------------------------------|---------------|----------------|-------------------------|---------------|----------------|
|                     | FA                    | pCA           | Others         | FA                                | pCA           | Others         | FA                      | pCA           | Others         |
| Broa-213            | 1.4                   | 1.5           | 97.0           | 6.7                               | 3.3           | 90.1           | 44.6                    | 5.4           | 50.0           |
| Pigarro             | 1.4                   | 1.4           | 97.2           | 3.9                               | 2.0           | 94.1           | 32.4                    | 5.6           | 62.0           |
| Castro Verde        | 1.4                   | 1.7           | 96.9           | 4.6                               | 2.4           | 93.0           | 43.8                    | 6.2           | 50.0           |
| Verdeal de Aperlada | 1.4                   | 1.4           | 97.2           | 4.7                               | 2.1           | 93.2           | 39.8                    | 4.3           | 55.9           |
| Fandango            | 1.6                   | 1.5           | 96.9           | 6.6                               | 2.7           | 90.7           | 40.3                    | 3.3           | 56.4           |
| Commercial          | 2.0                   | 1.7           | 96.3           | 4.8                               | 2.6           | 92.7           | 54.4                    | 2.9           | 42.8           |
| <i>Average</i>      | $1.5 \pm 0.3$         | $1.5 \pm 0.1$ | $96.9 \pm 0.3$ | $5.2 \pm 1.1$                     | $2.5 \pm 0.5$ | $92.3 \pm 1.6$ | $42.5 \pm 7.2$          | $4.6 \pm 1.4$ | $52.8 \pm 6.7$ |

Others: other compounds or synergistic effects. FA: 15.6  $\mu\text{mol TE mg}^{-1}$ ; pCA: 23  $\mu\text{mol TE mg}^{-1}$ ; TE: Trolox equivalents.

**Table S6.** Calculated values obtained for raw flours (RF = 70% maize + 20% rye + 10% wheat) and used for direct comparison with the corresponding *broas*.

| Variable |         | Fraction | Samples (raw flours) |         |              |                     |          |            |
|----------|---------|----------|----------------------|---------|--------------|---------------------|----------|------------|
|          |         |          | Broa-213             | Pigarro | Castro Verde | Verdeal de Aperlada | Fandango | Commercial |
| PC       | PCs     | SF       | 37.3                 | 29.6    | 30.3         | 32.9                | 29.7     | 26.3       |
|          | PCi     | IF       | 117                  | 147     | 149          | 165                 | 174      | 89.1       |
| AA       | AAs     | SF       | 0.71                 | 0.62    | 0.62         | 0.61                | 0.56     | 0.42       |
|          | AAi     | IF       | 2.53                 | 3.42    | 2.97         | 3.22                | 4.16     | 2.20       |
| FA       | FAf     | SF       | 0.31                 | 0.23    | 0.24         | 0.27                | 0.22     | 0.19       |
|          | FAc     | SHF-SF   | 4.78                 | 4.30    | 3.44         | 4.90                | 3.89     | 3.96       |
|          | FAi     | IF       | 68.6                 | 86.9    | 86.9         | 101.3               | 107.9    | 50.2       |
| pCA      | pCAf    | SF       | 0.13                 | 0.08    | 0.12         | 0.09                | 0.10     | 0.10       |
|          | pCAc    | SHF-SF   | 1.33                 | 1.18    | 1.14         | 1.07                | 0.91     | 0.82       |
|          | pCAi    | IF       | 6.37                 | 8.79    | 7.93         | 7.45                | 7.11     | 2.64       |
| HCAAs    | DCS     | SF       | 0.71                 | 0.37    | 0.65         | 0.50                | 0.55     | 0.18       |
|          | CFP     | SF       | 0.98                 | 0.41    | 0.78         | 1.09                | 0.75     | 0.18       |
|          | DFP     | SF       | 1.83                 | 0.87    | 1.91         | 2.36                | 1.36     | 0.33       |
| DFAs     | 8-O-4'- | IF       | 4.85                 | 7.09    | 7.69         | 9.10                | 10.21    | 2.91       |
|          | 8-5'-   | IF       | 1.72                 | 2.69    | 2.24         | 2.61                | 2.69     | 1.06       |
|          | 5-5'-   | IF       | 1.73                 | 2.85    | 3.00         | 3.24                | 4.42     | 1.37       |

SF: soluble fraction; SHF: soluble-hydrolysed fraction; IF: insoluble fraction; PCs: soluble phenolic content; AAs: soluble antioxidant activity; FAf: soluble-free ferulic acid; pCAf: soluble-free *p*-coumaric acid; FAc: soluble-conjugated ferulic acid; pCAc: soluble-conjugated *p*-coumaric acid; DFP: diferuloyl putrescine; DCS: dicoumaroyl spermidine; CFP: coumaroyl feruloyl putrescine; PCi: insoluble phenolic content; AAi: insoluble antioxidant activity; FAi: insoluble ferulic acid; pCAi: insoluble *p*-coumaric acid; 8O4DFA: 8-O-4'-dehydrodiferulic acid; 85DFA: 8-5'-DFA; 55DFA: 5-5'-DFA.

Values reported as: PC: mg GAE (gallic acid equivalents) 100 g<sup>-1</sup> dry weight (dw); AA: mmol of TE (Trolox equivalents) 100 g<sup>-1</sup> dw; pCA and FA: mg 100 g<sup>-1</sup> dw; DCS: mg pCAE (pCA equivalents) 100 g<sup>-1</sup> dw; CFP, DFP, and DFAs: mg FAE (FA equivalents) 100 g<sup>-1</sup> dw.
